# Supplementary material
Source: publisher figshare collection journal article supplement (https://sage.figshare.com/ndownloader/files/12454724)
Supplement: Supplementary file 1 [file 12454724]

## Supplementary Material

### Appendix I.

Conversion table of sum scores to obtain the HUH-person-measure in logit units

| Sum score | HUH-score (logits) | SE   | Sum score (continued) | HUH-score (logits) | SE   |
|-----------|--------------------|------|-----------------------|--------------------|------|
| 0         | -4.695             | NA   | 19                    | 0.513              | 0.37 |
| 1         | -3.853             | 1.04 | 20                    | 0.649              | 0.37 |
| 2         | -3.082             | 0.76 | 21                    | 0.786              | 0.37 |
| 3         | -2.597             | 0.64 | 22                    | 0.925              | 0.37 |
| 4         | -2.230             | 0.57 | 23                    | 1.066              | 0.38 |
| 5         | -1.927             | 0.53 | 24                    | 1.211              | 0.38 |
| 6         | -1.667             | 0.50 | 25                    | 1.361              | 0.39 |
| 7         | -1.431             | 0.47 | 26                    | 1.518              | 0.40 |
| 8         | -1.218             | 0.45 | 27                    | 1.684              | 0.41 |
| 9         | -1.022             | 0.44 | 28                    | 1.861              | 0.43 |
| 10        | -0.838             | 0.42 | 29                    | 2.053              | 0.45 |
| 11        | -0.665             | 0.41 | 30                    | 2.265              | 0.47 |
| 12        | -0.500             | 0.40 | 31                    | 2.506              | 0.51 |
| 13        | -0.343             | 0.39 | 32                    | 2.788              | 0.56 |
| 14        | -0.191             | 0.39 | 33                    | 3.134              | 0.62 |
| 15        | -0.044             | 0.38 | 34                    | 3.599              | 0.75 |
| 16        | 0.098              | 0.38 | 35                    | 4.352              | 1.03 |
| 17        | 0.238              | 0.37 | 36                    | 5.174              | NA   |
| 18        | 0.376              | 0.37 |                       |                    |      |

HUH-score= Hand-Use-at-Home score, SE= standard error, NA= not applicable

## Appendix II

The Hand Use at Home Questionnaire items, ordered to difficulty\*

---

### How often does your child use the affected hand spontaneously to .....

---

pick up a large ball (football size) from the floor?  
catch a large ball (football size) while playing ball games?  
move a chair?  
hold a book while reading or looking at pictures?  
throw a large ball (football size) while playing ball games?  
assist in closing a zipper (jacket/cardigan/pants etc.)?  
play with construction toys (Lego/Duplo/etc.)?  
stabilise paper while drawing or writing?  
assist undressing the upper body (remove singlet, shirt, sweater)?  
hold a toy while playing on the floor?  
assist with tearing off and folding toilet paper when using the toilet?  
assist with opening, closing buttons (jacket/blouse/pants etc.)?  
hold a shovel while digging a hole in the sand (beach/garden/sandbox)?  
assist putting toothpaste on a toothbrush?  
assist with buttering bread?  
pull off socks?  
hold a toy while walking?  
hold a fork while cutting food?

---

\* The Hand Use at Home questionnaire is at the moment only officially available in Dutch. The translation in Appendix II is not an official translation. Official translation of the Hand Use at Home questionnaire is currently underway.
